# Supplementary material for: Polymorphisms Analysis of BMP15, GDF9 and BMPR1B in Tibetan Cashmere Goat (Capra hircus)
Source: MDPI journal article supplement (doi:10.3390/genes14051102), 2023-05-18
Supplement: s1 [file s1]

Supplementary Table and Figures

**Supplementary Table S1.** Positions of mutations with changes in bases and its effect with amino acids in BMP 15 of Tibetan cashmere goat

| Mutation | Position(bp) | Base change | Codon    | Amino acid change                 |
|----------|--------------|-------------|----------|-----------------------------------|
| G732A    | 732          | G-A         | AAG*-AAA | Lysine (K) unchanged              |
| C805G    | 805          | C-G         | C*AA-GAA | Glutamine (Q) - Glutamic acid (E) |

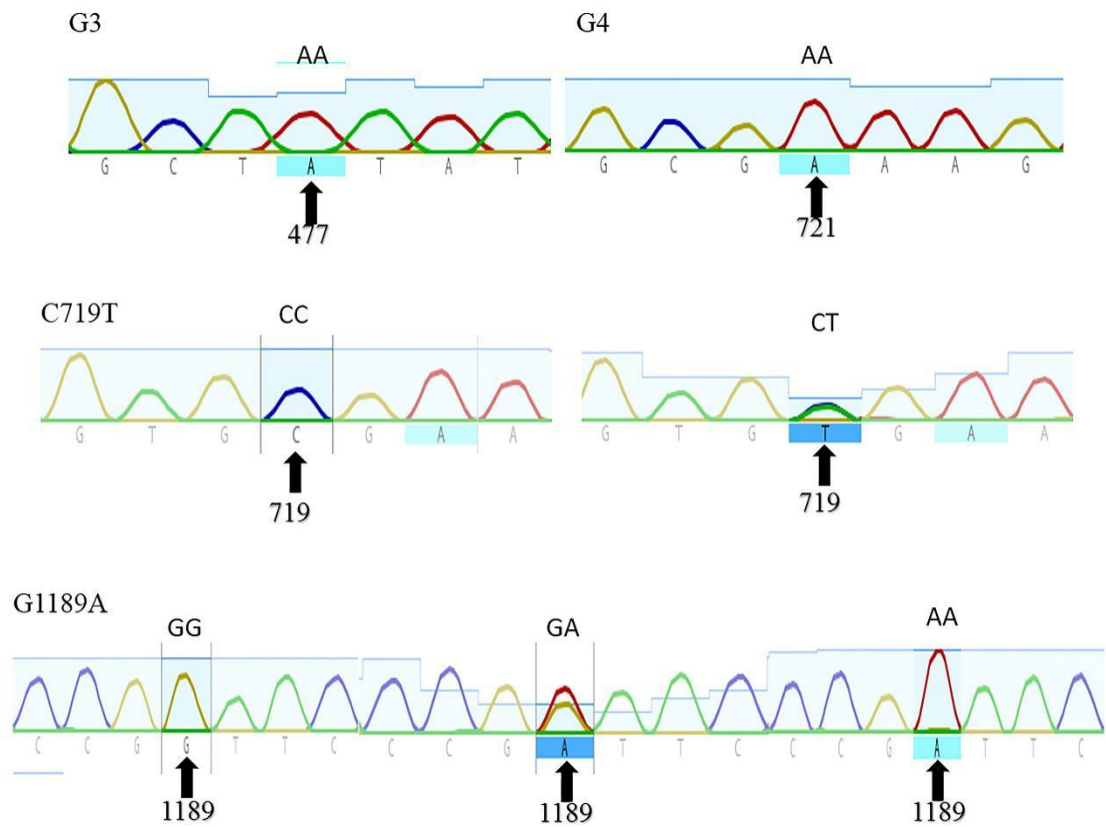

**Supplementary Figure S1.** Sequence maps of GDF9.

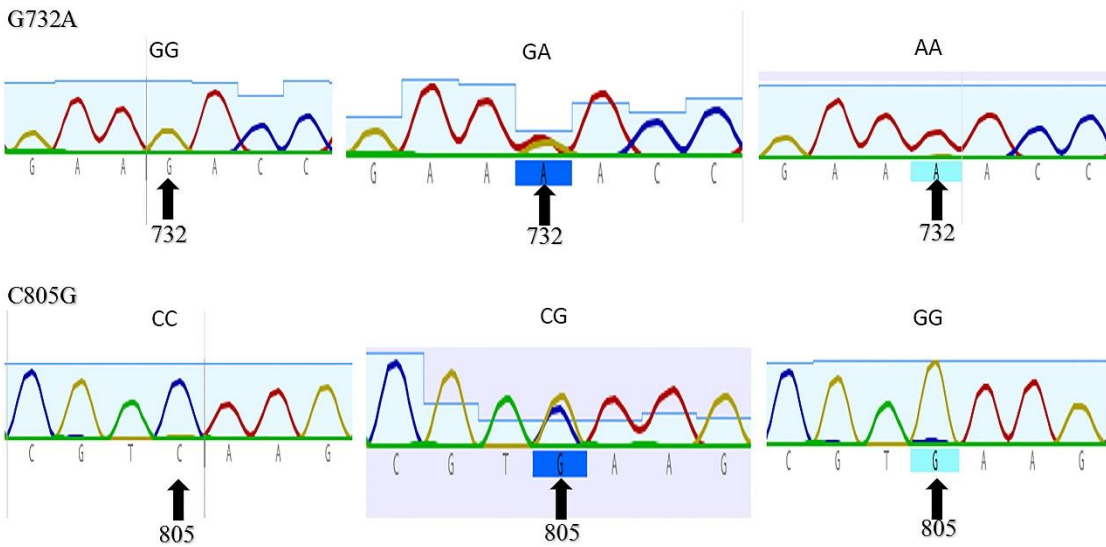

**Supplementary Figure S2.** Sequence maps of BMP15.
